# Supplementary material
Source: HighWire-hosted journal article supplement (https://www.cmajopen.ca/highwire/filestream/84467/field_highwire_adjunct_files/0/2020-0059-1-at.pdf)
Supplement: 2020-0059-1-at.pdf [file 2020-0059-1-at.pdf]

**Appendix 1 (as supplied by the authors): Poster**

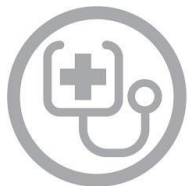

# Well-Being Index

## Why?

- ④ To assess the well-being of clinicians (nurses, allied health, pharmacists, physicians) at PMCC.

## What?

- ④ The Well-Being Index is a web-based tool that evaluates multiple dimensions of your well-being.
- ④ You will receive your own individual results. Your responses and your dashboard of results are **completely anonymous and confidential**.
- ④ PMCC will only receive aggregate anonymous data. This data will help us focus on caring for our caregivers.

## When?

- ④ On November 27, you will receive an email invitation from Canadian Viewpoint with the subject line “Invitation to use the Well-Being Index”.
- ④ The email invitation will have information and instructions that explain how to complete the Well-Being Index.

Thank you for participating in this important survey.
